# Supplementary material for: In Vitro Effects of Lead on Gene Expression in Neural Stem Cells and Associations between Up-regulated Genes and Cognitive Scores in Children
Source: PubMed Central journal article supplement (PMC5381979; doi:10.1289/ehp265), 2016-08-26

**Note to readers with disabilities:** *EHP* strives to ensure that all journal content is accessible to all readers. However, some figures and Supplemental Material published in *EHP* articles may not conform to [508 standards](#) due to the complexity of the information being presented. If you need assistance accessing journal content, please contact [ehp508@niehs.nih.gov](mailto:ehp508@niehs.nih.gov). Our staff will work with you to assess and meet your accessibility needs within 3 working days.

## **Supplemental Material**

### ***In Vitro* Effects of Lead on Gene Expression in Neural Stem Cells and Associations between Upregulated Genes and Cognitive Scores in Children**

Peter J. Wagner, Hae-Ryung Park, Zhaoxi Wang, Rory Kirchner, Yongyue Wei, Li Su, Kirstie Stanfield, Tomas R. Guilarte, Robert O. Wright, David C. Christiani, and Quan Lu

#### **Table of Contents**

**Table S1.** Primers Used in Study

**Table S2.** Characteristics of the ELEMENT cohort

**Figure S1.** Histone H3 ChIP followed by PCR amplification of the putative SPP1 ARE. NRF2 was activated by KEAP1 knockdown (H3 si). NT-siRNA was transfected into control cells (H3 NT). Following H3 ChIP, qPCR was done to measure the presence of the SPP1 ARE.

#### **Additional File**

##### **Supplemental Code and Data ZIP File**

**Excel File Table S1.** Full results from the differential expression analysis

Table S1. Primers Used in Study

| <b>Target</b> | <b>Application</b> | <b>Forward</b>          | <b>Reverse</b>          |
|---------------|--------------------|-------------------------|-------------------------|
| DIO3OS        | QPCR               | GCTACAGGCTTCAGCAGGTC    | CCCCAGACAGCAGAGAAATC    |
| F2RL2         | QPCR               | GCAAAGCCAACCTTACCCATT   | GAGGTAGATGGCAGGTATCAGT  |
| FTL           | QPCR               | CAGCCTGGTCAATTTGTACCT   | GCCAATTCGCGGAAGAAGTG    |
| HMOX1         | QPCR               | GGCAGAGGGTGATAGAAGAGG   | AGCTCCTGCAACTCCTCAAA    |
| LUCAT1        | QPCR               | CGATCTCGGTTCACTGCAA     | AGCAAACAGCAAGTTGGATTC   |
| NQO1          | QPCR               | GAAGAGCACTGATCGTACTGGC  | GGATACTGAAAGTTCGCAGGG   |
| OSGIN1        | QPCR               | CGAGGGTGTGCGAGAAGGTG    | TCCACGTCAATGGGGTTCCT    |
| SPP1          | QPCR               | GGAGTTGAATGGTGCATACAAGG | CCACGGCTGTCCCAATCAG     |
| KEAP1         | QPCR               | CTGGAGGATCATACCAAGCAGG  | GGATACCCTCAATGGACACCAC  |
| NRF2          | QPCR               | TCCAGTCAGAAACCAGTGGAT   | GAATGTCTGCGCCAAAAGCTG   |
| SPP1-a        | QPCR               | ATCTCCTAGCCCCACAGAAT    | CATCAGACTGGTGAGAATCAT   |
| SPP1-b        | QPCR               | ATCTCCTAGCCCCAGAGAC     | AAAATCAGTGACCAGTTCATCAG |
| SPP1-c        | QPCR               | TGAGGAAAAGCAGAATGCTG    | GTCAATGGAGTCCTGGCTGT    |
| NQO1 ARE      | ChIP-QPCR          | CCCTTTTAGCCTTGGCACGAAA  | TGCACCCAGGGAAGTGTGTGTAT |
| SPP1 ARE      | ChIP-QPCR          | ATAGGTAGGCTGGGCGATTT    | GTGGTTCTGAATTCGCTGT     |
| GAPDH         | QPCR               | GGAAACTGTGGCGTGATG      | AGTGAGCTTCCCGTTCAG      |

Table S2. Characteristics of the ELEMENT cohort

| <b>Trait</b>                                                | <b>Cohort</b> |
|-------------------------------------------------------------|---------------|
| Number of participants                                      | 462           |
| Sex (male/female)                                           | 245/217       |
| Mean gestational age in weeks (sd)                          | 38.38 (1.65)  |
| Mean maternal age in years at birth (sd)                    | 27.81 (5.51)  |
| Percentage of mothers married                               | 80.3%         |
| Percentage of children with siblings                        | 53.0%         |
| Percentage of mothers who completed high school education   | 58.4%         |
| Mean second trimester maternal blood Pb level in ug/dL (sd) | 3.76 (2.62)   |
| Mean Raw Cognitive Development Index at ~24 months (sd)     | 92.48 (8.33)  |
| Mean Raw Language Development Index at ~24 months (sd)      | 89.76 (9.08)  |
| Mean Raw Psychomotor Development Index at ~24 months (sd)   | 93.95 (10.58) |

Figure S1. Histone H3 ChIP followed by PCR amplification of the putative SPP1 ARE. NRF2 was activated by KEAP1 knockdown (H3 si). NT-siRNA was transfected into control cells (H3 NT). Following H3 ChIP, qPCR was done to measure the presence of the SPP1 ARE.

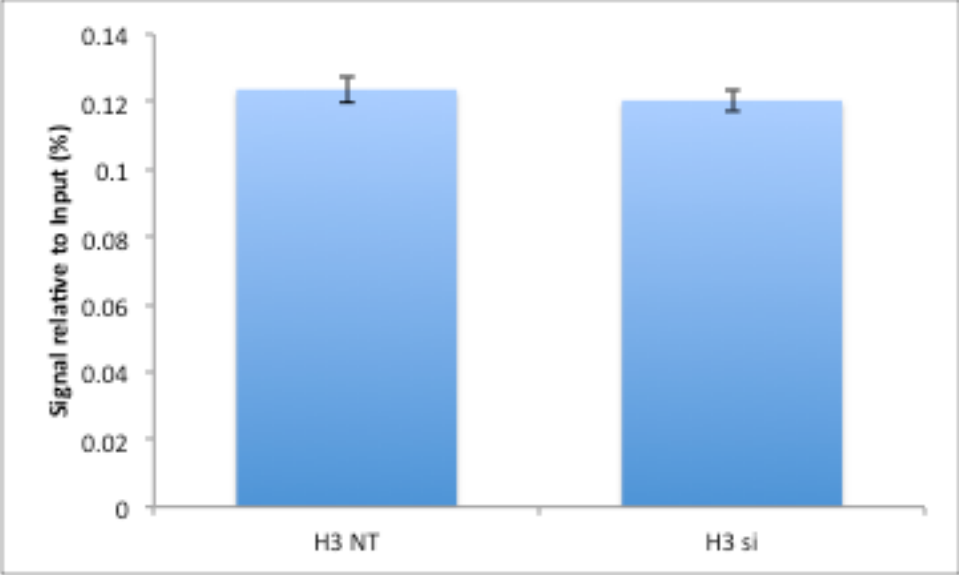

Supplement: EHP265.s001.acco.pdf [file EHP265.s001.acco.pdf]
